# Supplementary material
Source: Springer Nature journal article supplement (https://www.springermedizin.de/resource/supplementary/12958_2005_288_MOESM1_ESM.pdf/9567664)

**A**

10 20 30 40 50 60 70 80 90 100

Human MAAEDVVATGADPSDLESGGLLHEIFTSPINLLLLGLCIFLLYKIVRGDQPAASGSDDDDEPPPLPRPKRRDFTPAELRRFDGVQDPRILMAINGKVFDV  
 Porcine MAAEDVAATGADPSELEGGGLLHEIFTSPINLLLLGLCIFLLYKIVRGDQPAAS-DSDDDEPPPLPRPKRRDFTPAELRRFDGVQDPRILMAINGKVFDV  
 Mouse MAAEDVVATGADPSELEGGGLLHEIFTSPINLLLLGLCIFLLYKIVRGDQPAASGSDNDDEPPPLPRPKRRDFTPAELRRFDGVQDPRILMAINGKVFDV  
 Rat MAAEDVVATGADPSELEGGGLLHEIFTSPINLLLLGLCIFLLYKIVRGDQPAASGSDNDDEPPPLPRPKRRDFTPAELRRFDGVQDPRILMAINGKVFDV  
 Xenopus t MAEE-----GILQEIFTSPINICLLCLCLYLLYKILRGDKPQTENNEEQ-----LPRMKRRDFTPAELRKYDGVQNPRIILMAISGKVFDV  
 Xenopus l MAEE-----GILQEIFTSPINICLLCLCLYLLYKILRGDKPQSNENTEEQ-----LPRMKRRDFTPAELRKYDGVQNPRIILMAISNKVFDV  
 Tetraodon MAEAEAGDTTSG-----GILQEIFTSPINLTLLSLCLFLLYKIVRGDKPQDFAEEEKF-----LPRMKRRDFTPAELRKYDGIENPRIILMAVNGKVFDV  
 Zebrafish MA--EEAVEQTS-----GILQEIFTSPINISLLCLCLFLLYKIVRGDKPADYGPVEEP-----LPKLKKRDFTLADLQEYDGLKNPRIILMAVNGKVFDV  
 Trout MADTEGAEEIYP-----GILQEIFTSPINLSLLGLCIFLLYKIVRGDKPADMGEVEEP-----LPKLKKRDFTLTELQYDGLQNPRIILMAVNFKVFDV

110 120 130 140 150 160 170 180 190

Human TKGRKFYGPPEGYPYGVFAGRNASRGLATFCLDKALKDEYDSDLTAAQQETLSDWESQFTFKYHHVVKLLKEGEEPTVYSDDEEPKDESARKND-  
 Porcine TKGRKFYGPPEGYPYGVFAGRNASRGLATFCLDKALKDEYDSDLTAAQQETLNDWDSQFTFKYHHVVKLLKEGEEPTVYSDDEEPKDESARKND-  
 Mouse TKGRKFYGPPEGYPYGVFAGRNASRGLATFCLDKALKDEYDSDLTAAQQETLSDWDSQFTFKYHHVVKLLKEGEEPTVYSDDEEPKDETARKNE-  
 Rat TKGRKFYGPPEGYPYGVFAGRNASRGLATFCLDKALKDEYDSDLTAAQQETLNDWDSQFTFKYHHVVKLLKEGEEPTVYSDDEEPKDEAARKSD-  
 Xenopus t TRGKKFYGPPEGYPYGVFAGRNASRGLATFCLDKALKDITYDSDLTATQRETLSDEWAEQFTFKYHHVVKLLKDGEEPTVYTDDEDAKDTSDLKKN  
 Xenopus l TRGKKFYGPDGYPYGVFAGRNASRGLATFCLDKALKDITDSDLTATQKETLNDWEEQFTFKYHHVVKLLKAGEEPTVYTDDEDAKSSDSKKN  
 Tetraodon TRGKKFYGPDGYPYGVFAGRNASRGLATFCLDKALKDEHDDLSDLNASQWESLSDWAEQFTFKYDYIGKLLKPGEEPAEYTDDEEGKDK--K--  
 Zebrafish TRGKKFYGPPEGYPYGVFAGKASRGLATFCLDKALKDTHDDLSDLNAMQQESLSEWETQFTQKYDYIGKLLKPGEEPTVYTDDEEVKDK--K--  
 Trout TRGKKFYGPPEGYPYGVFAGKASRGLATFCLDKALKDTHDDLSDLNAMQQESLSEWETQFTQKYDYVGLKLLKAGEEPTVYTDDEEVKDK--K--

**B**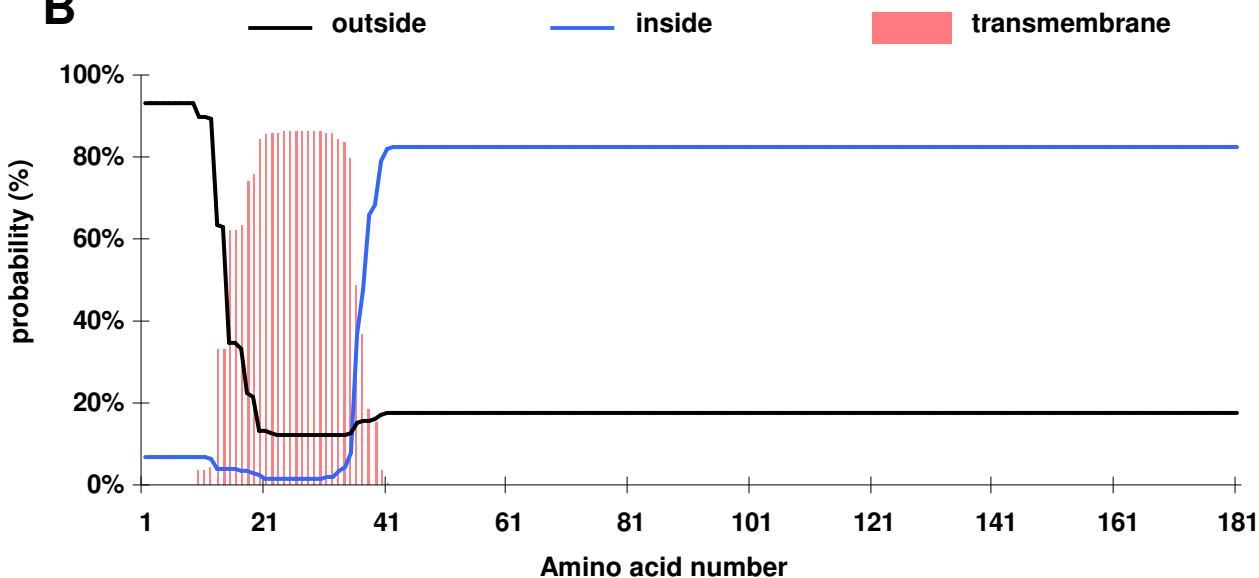**C**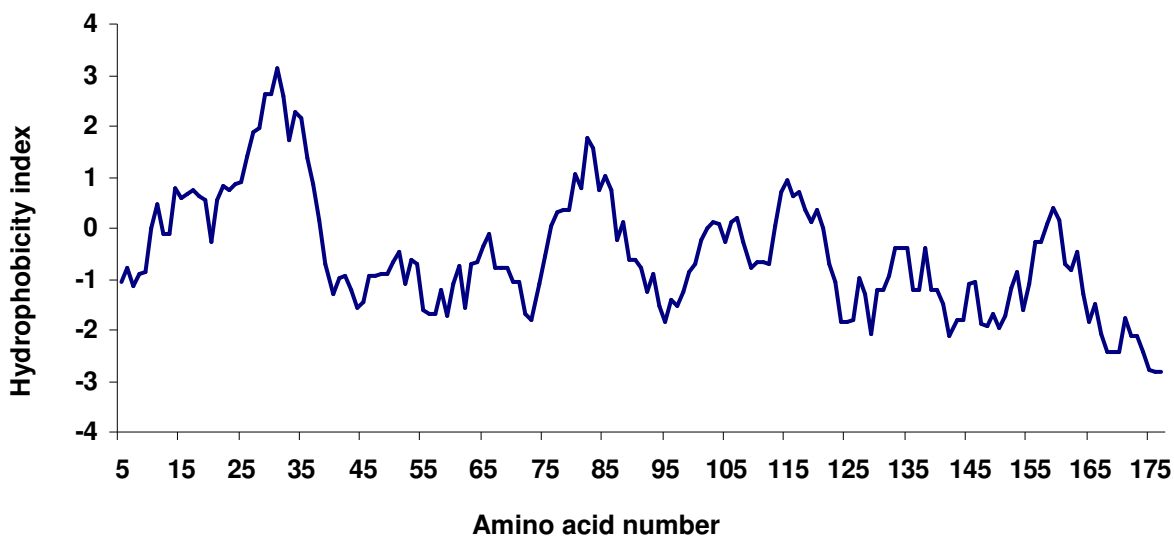

Supplement: MOESM1 [file 9567664]
